# Supplementary material
Source: publisher figshare collection journal article supplement (https://frontiersin.figshare.com/ndownloader/files/31135720)
Supplement: Supplementary file 1 [file 31135720]

Archive with 7 entries (7 files):
- Figure S1.PDF
- Figure S2.PDF
- Figure S3.PDF
- Figure S4.PDF
- Figure S5.PDF
- Figure S6.PDF
- Supplementary Materials.PDF
