# Supplementary material
Source: publisher figshare collection journal article supplement (https://frontiersin.figshare.com/ndownloader/files/31135720)

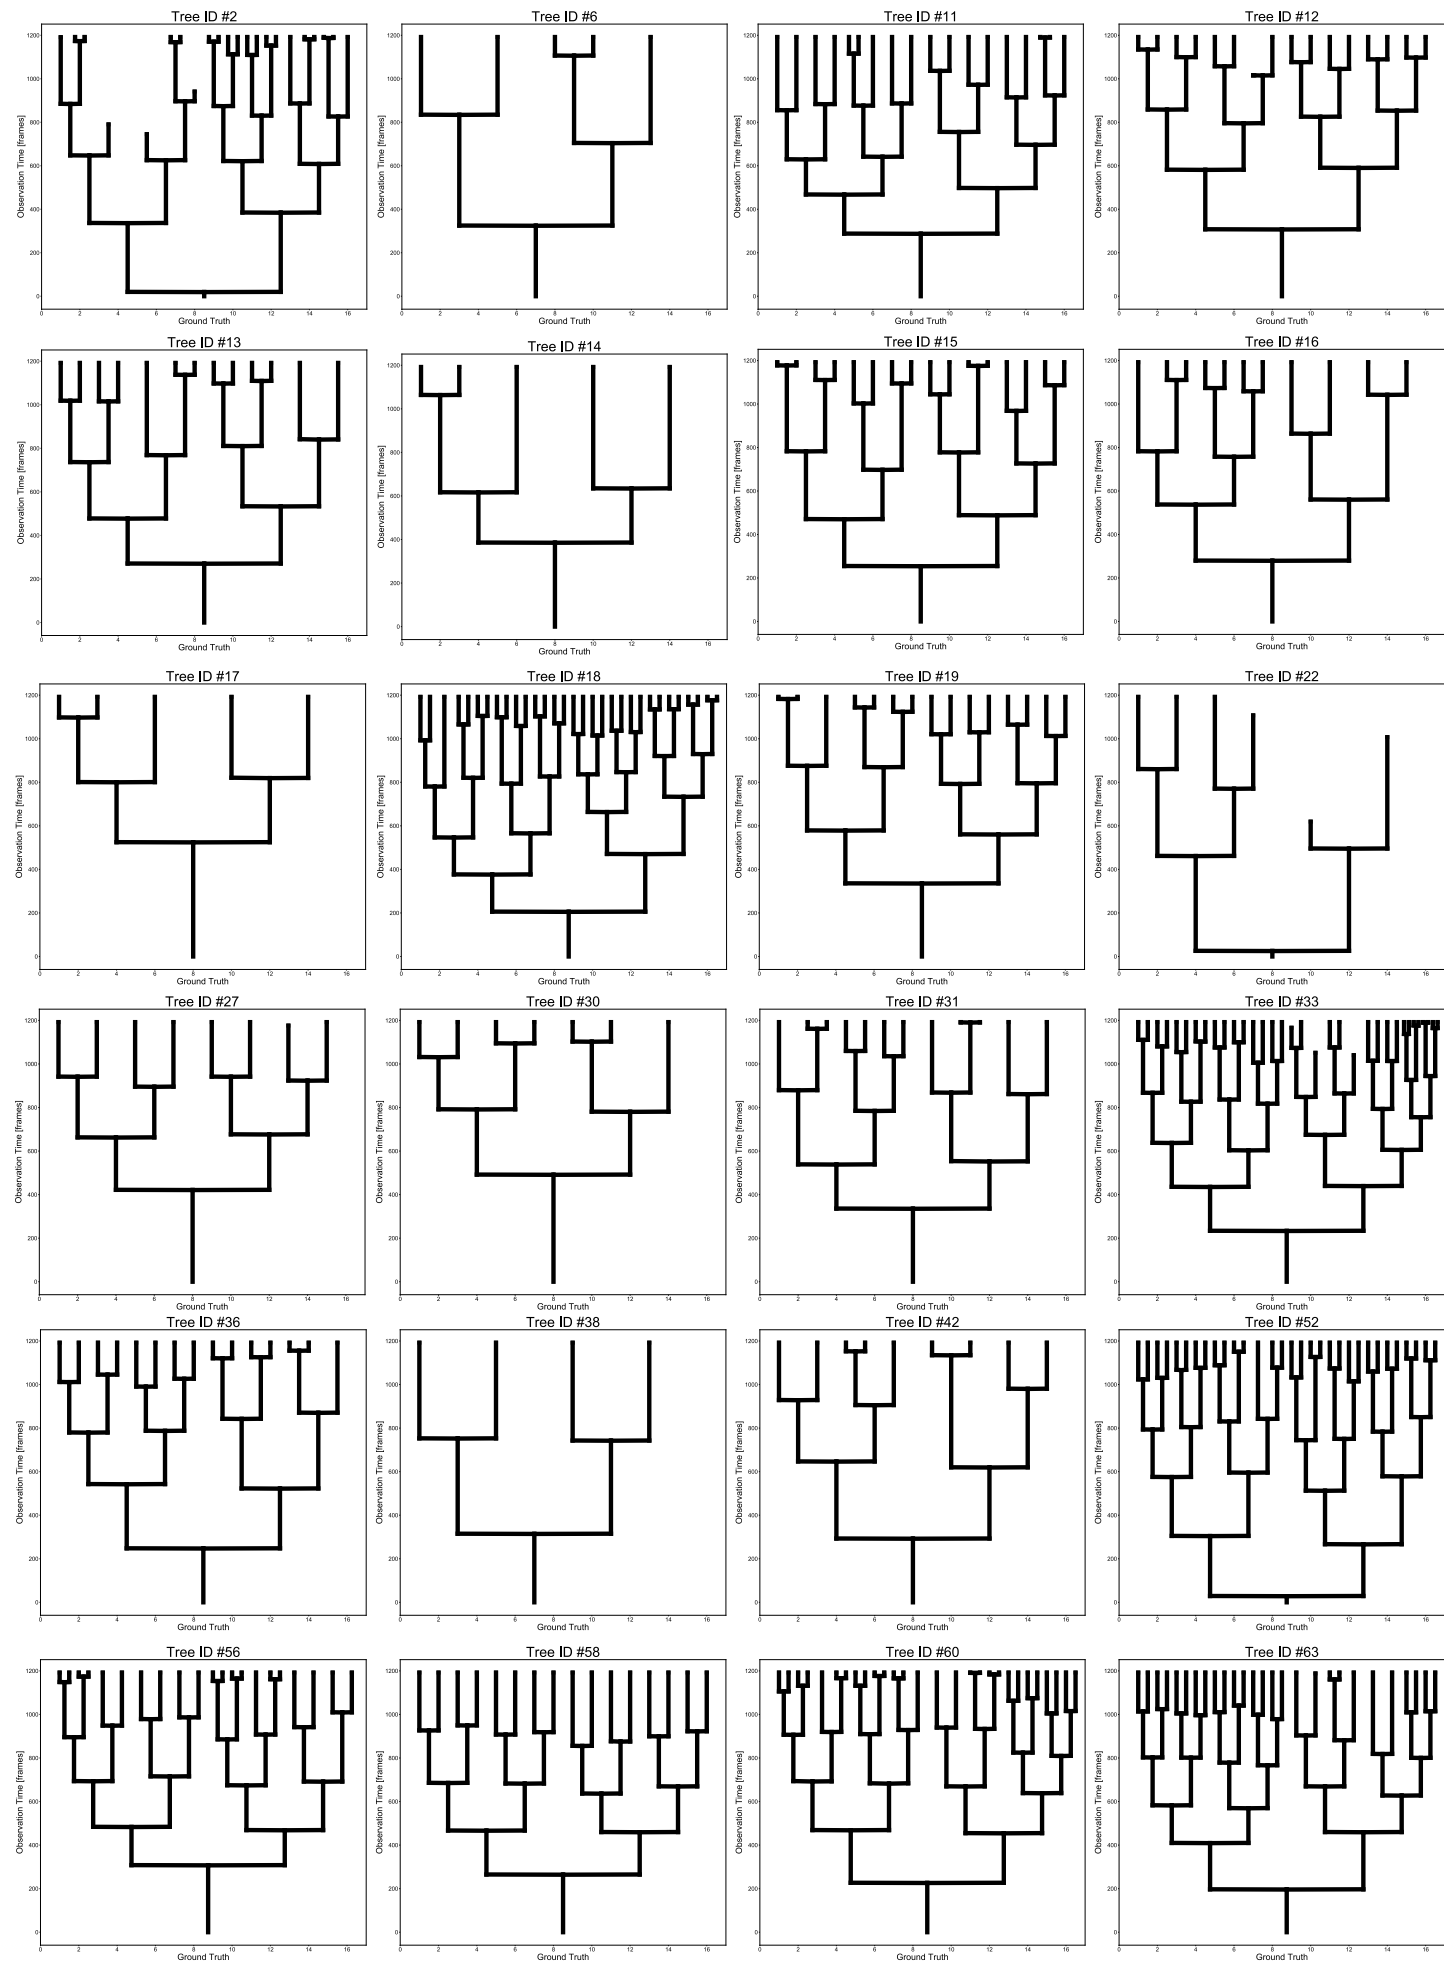

Supplement: Supplementary file 1 [file 31135720 › Figure S1.PDF]

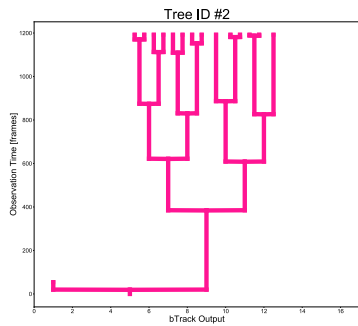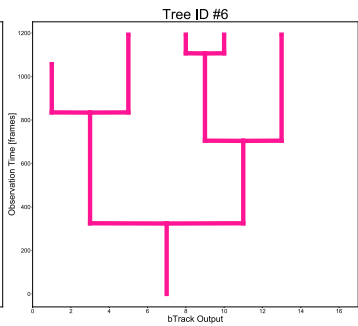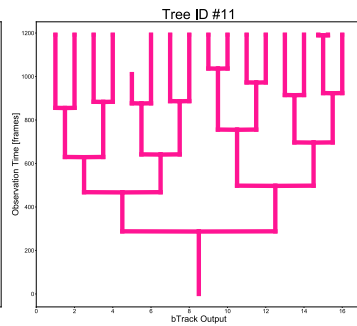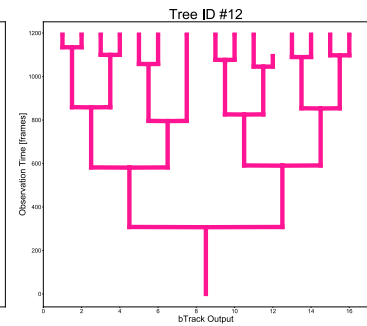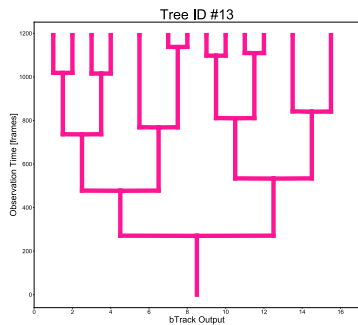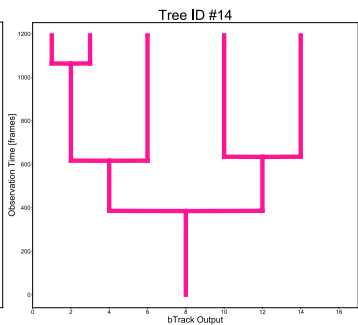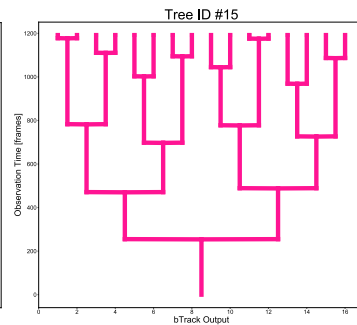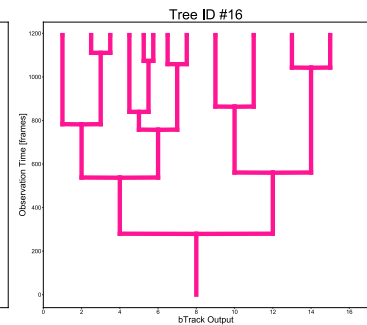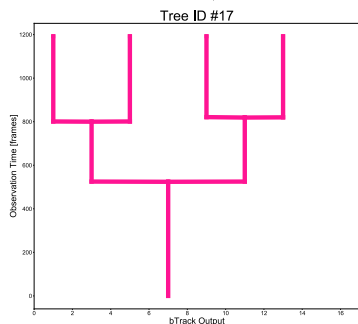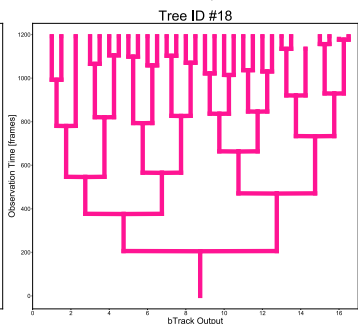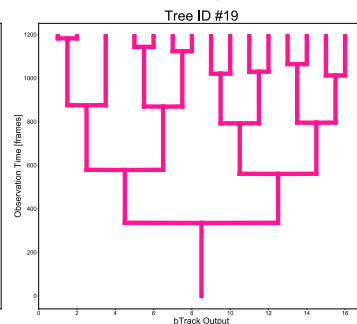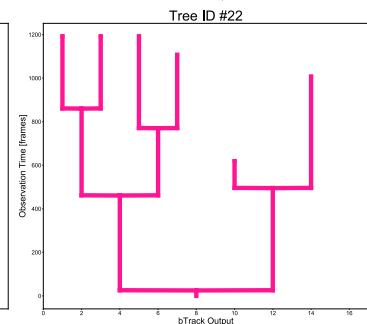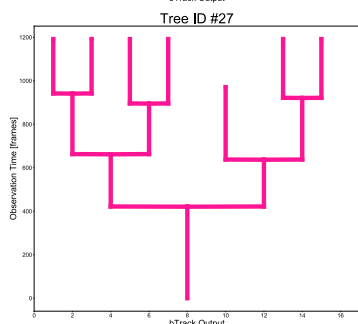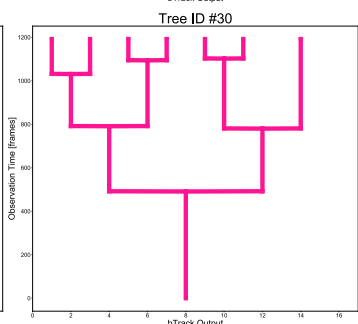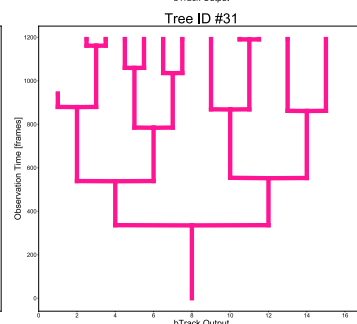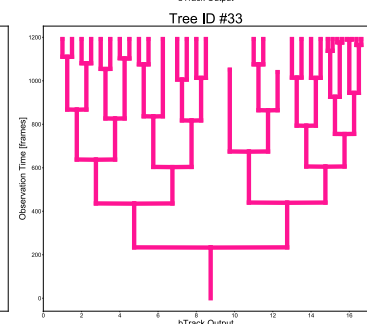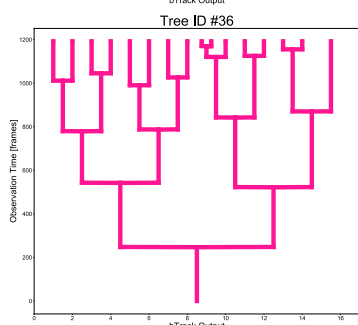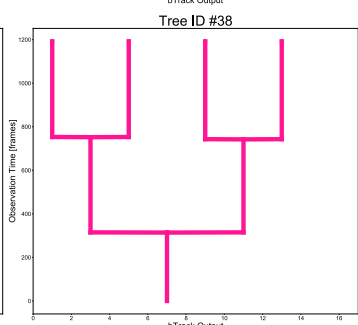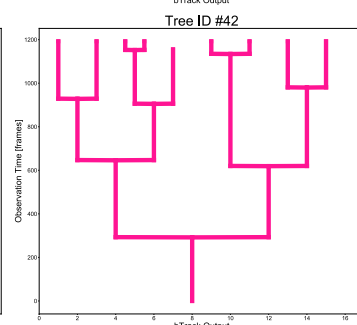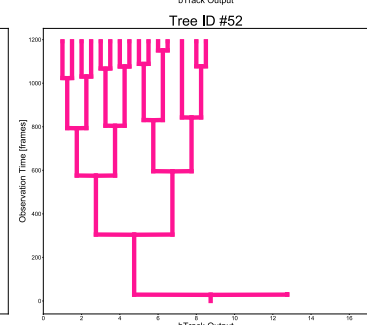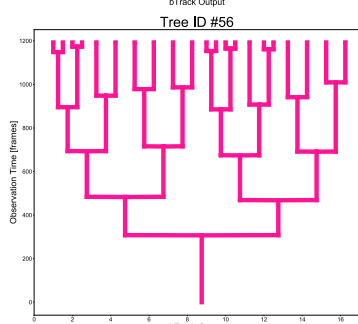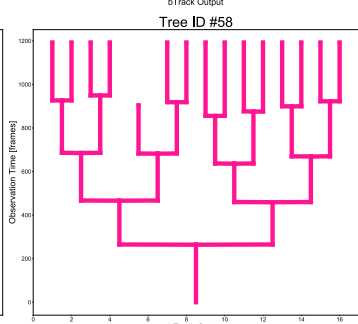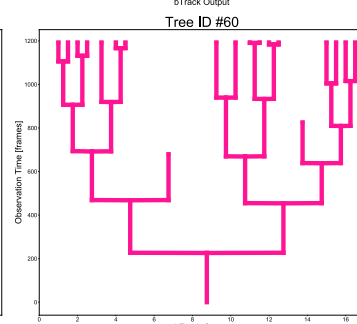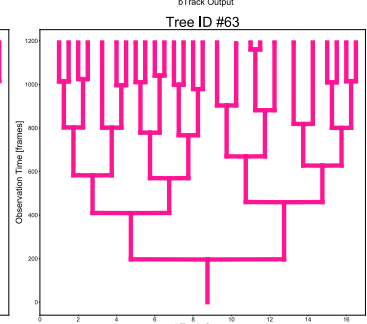

Supplement: Supplementary file 1 [file 31135720 › Figure S2.PDF]

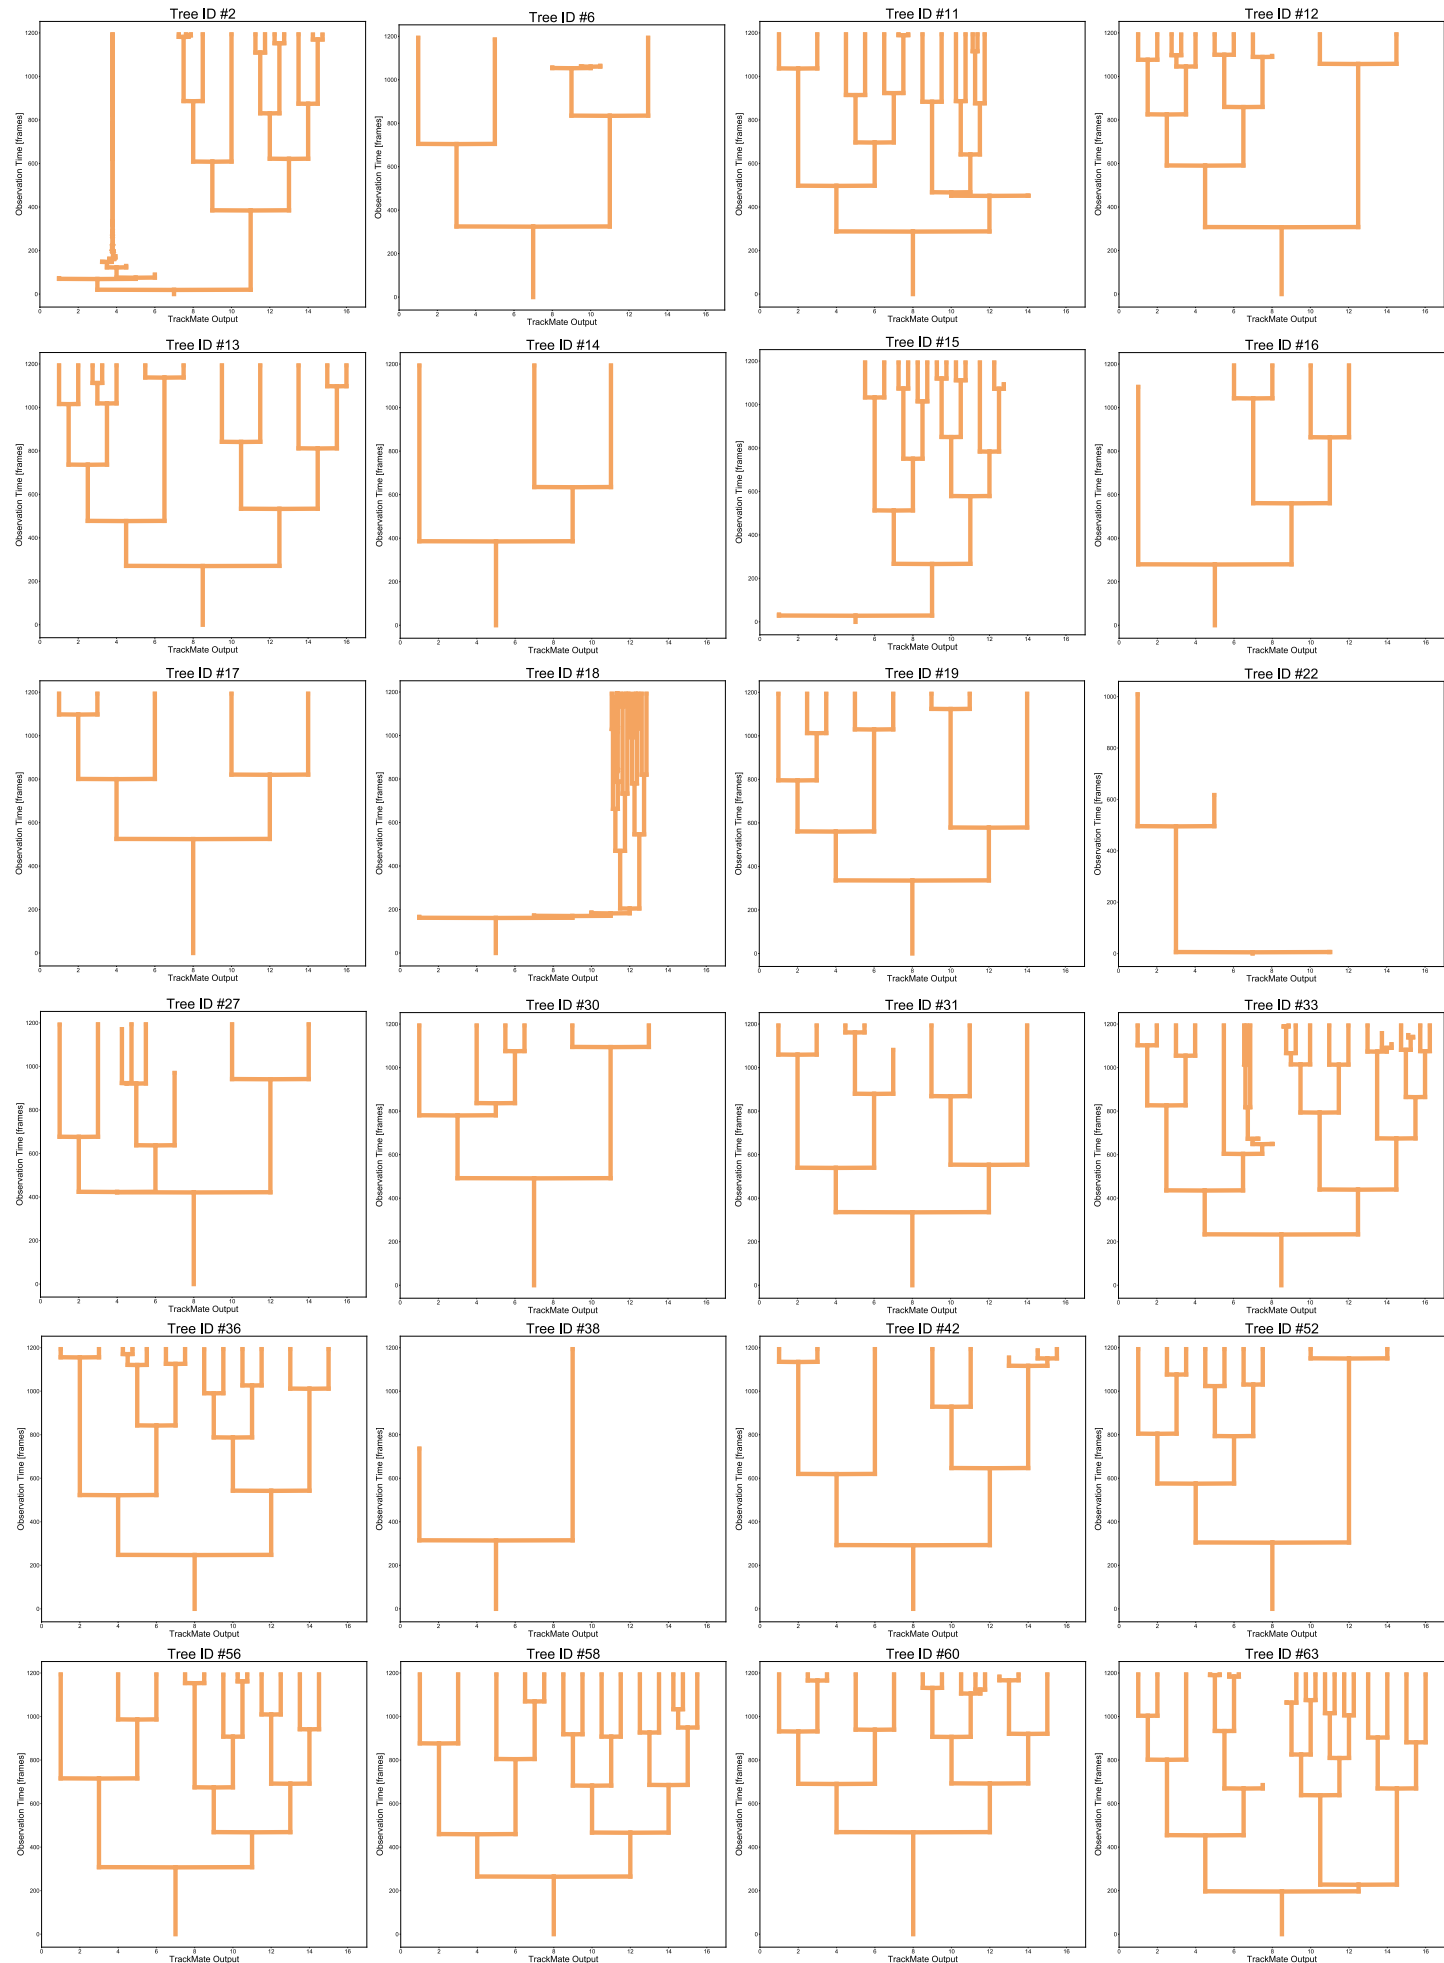

Supplement: Supplementary file 1 [file 31135720 › Figure S3.PDF]

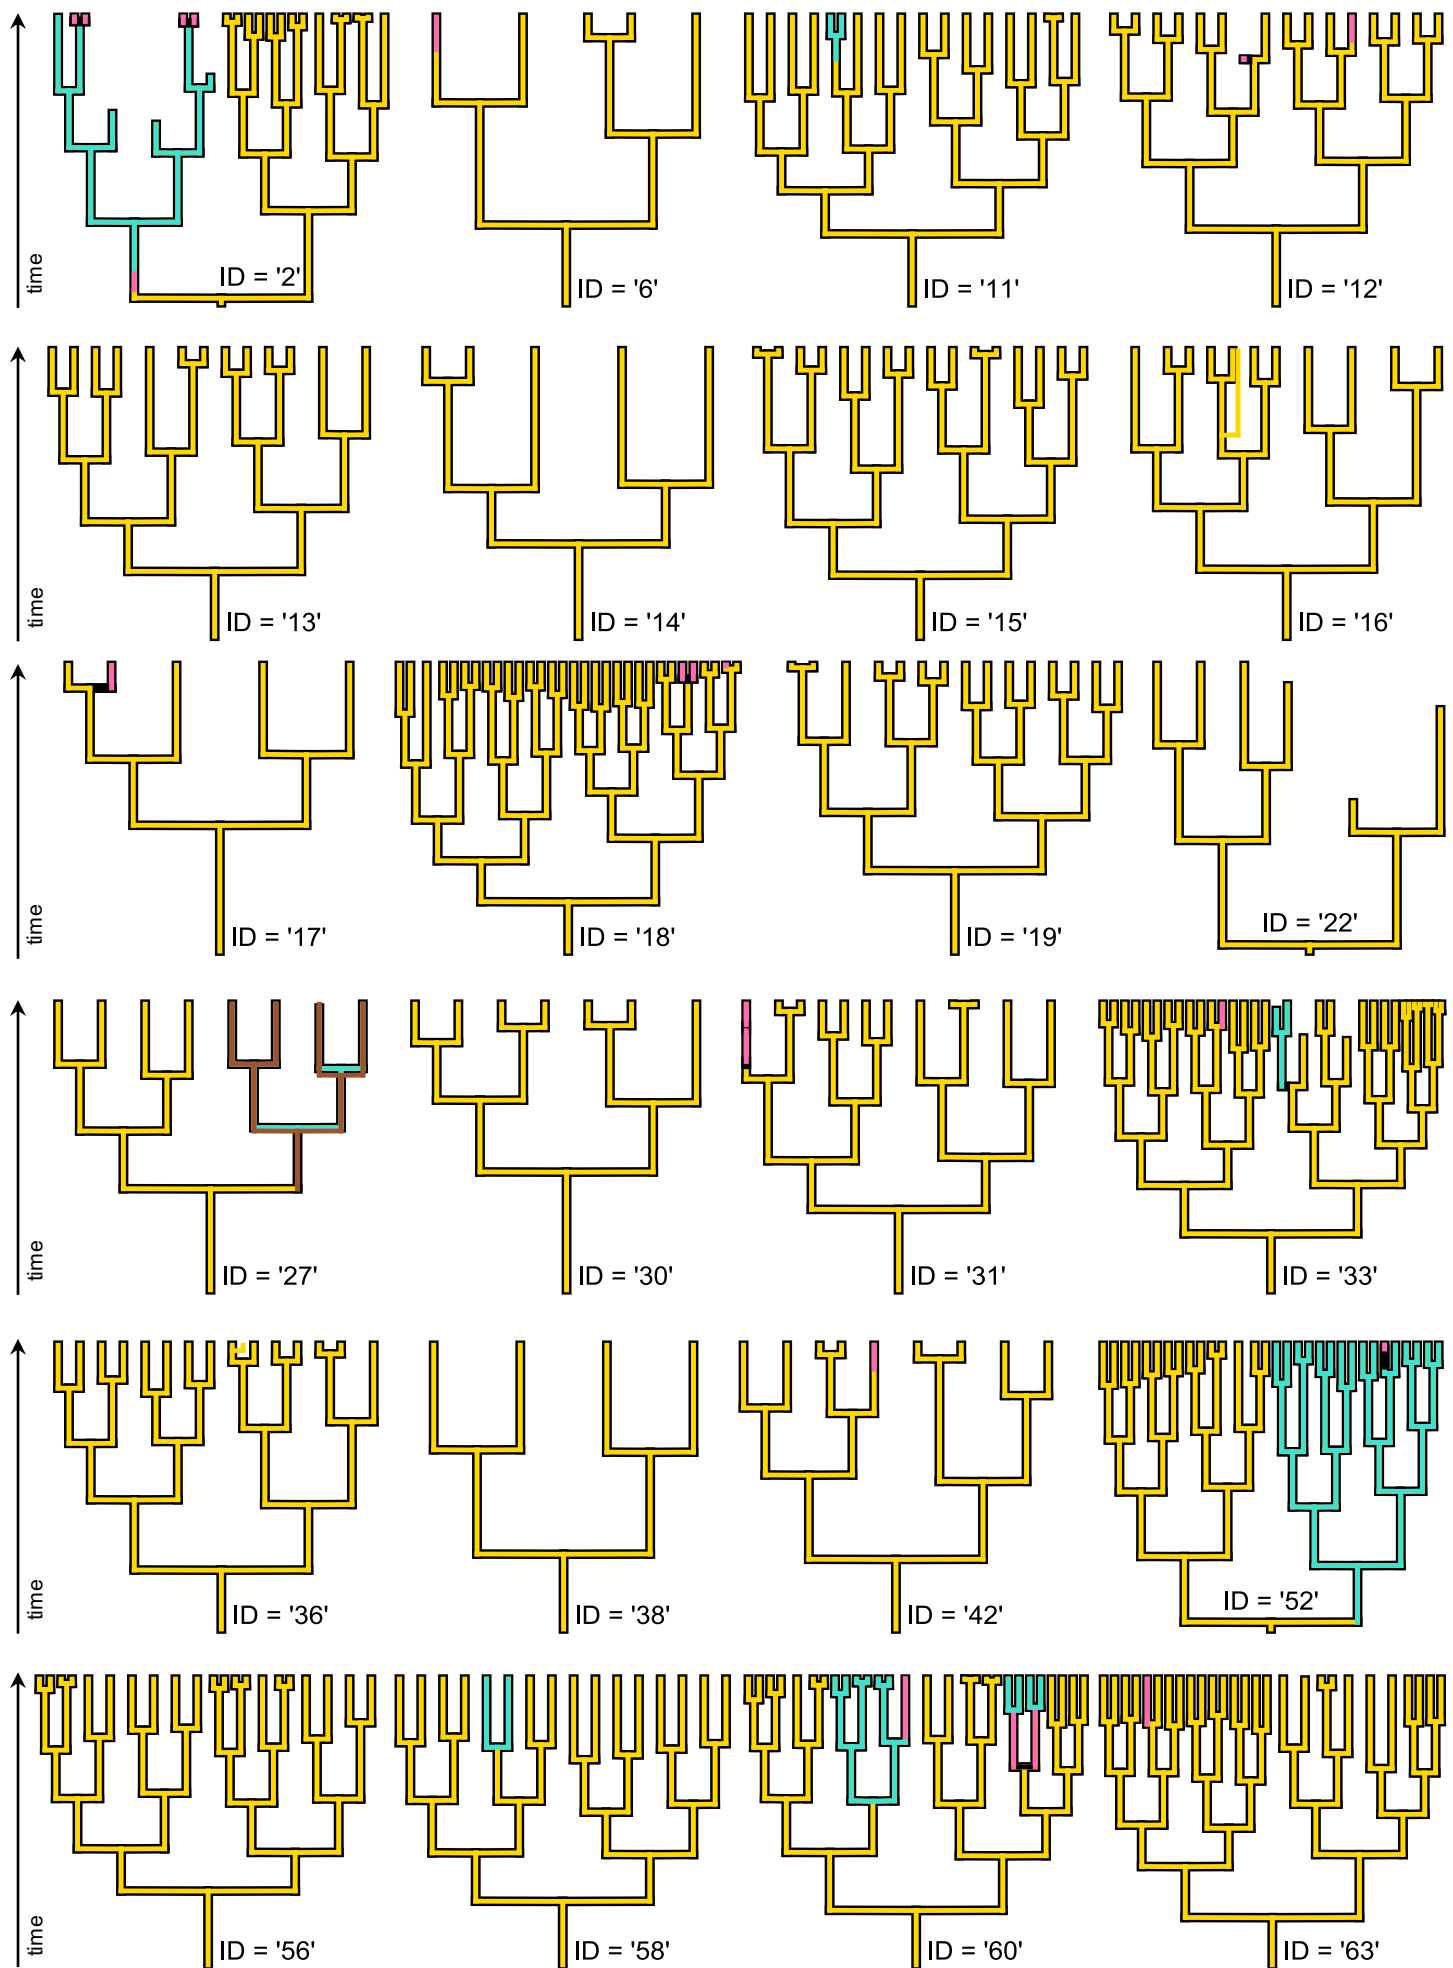

Supplement: Supplementary file 1 [file 31135720 › Figure S4.PDF]

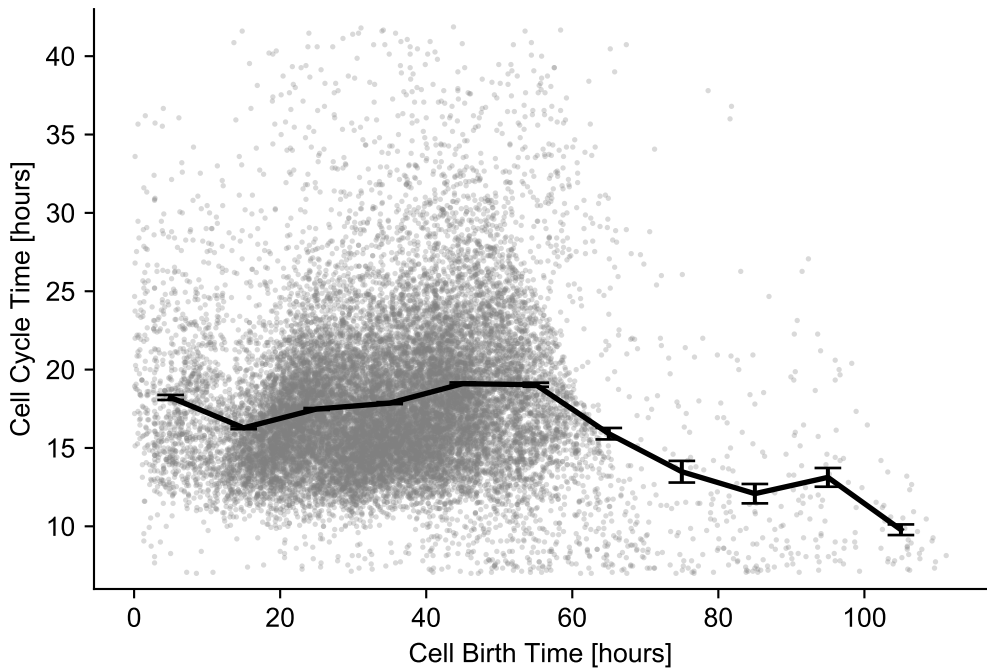

Supplement: Supplementary file 1 [file 31135720 › Figure S5.PDF]

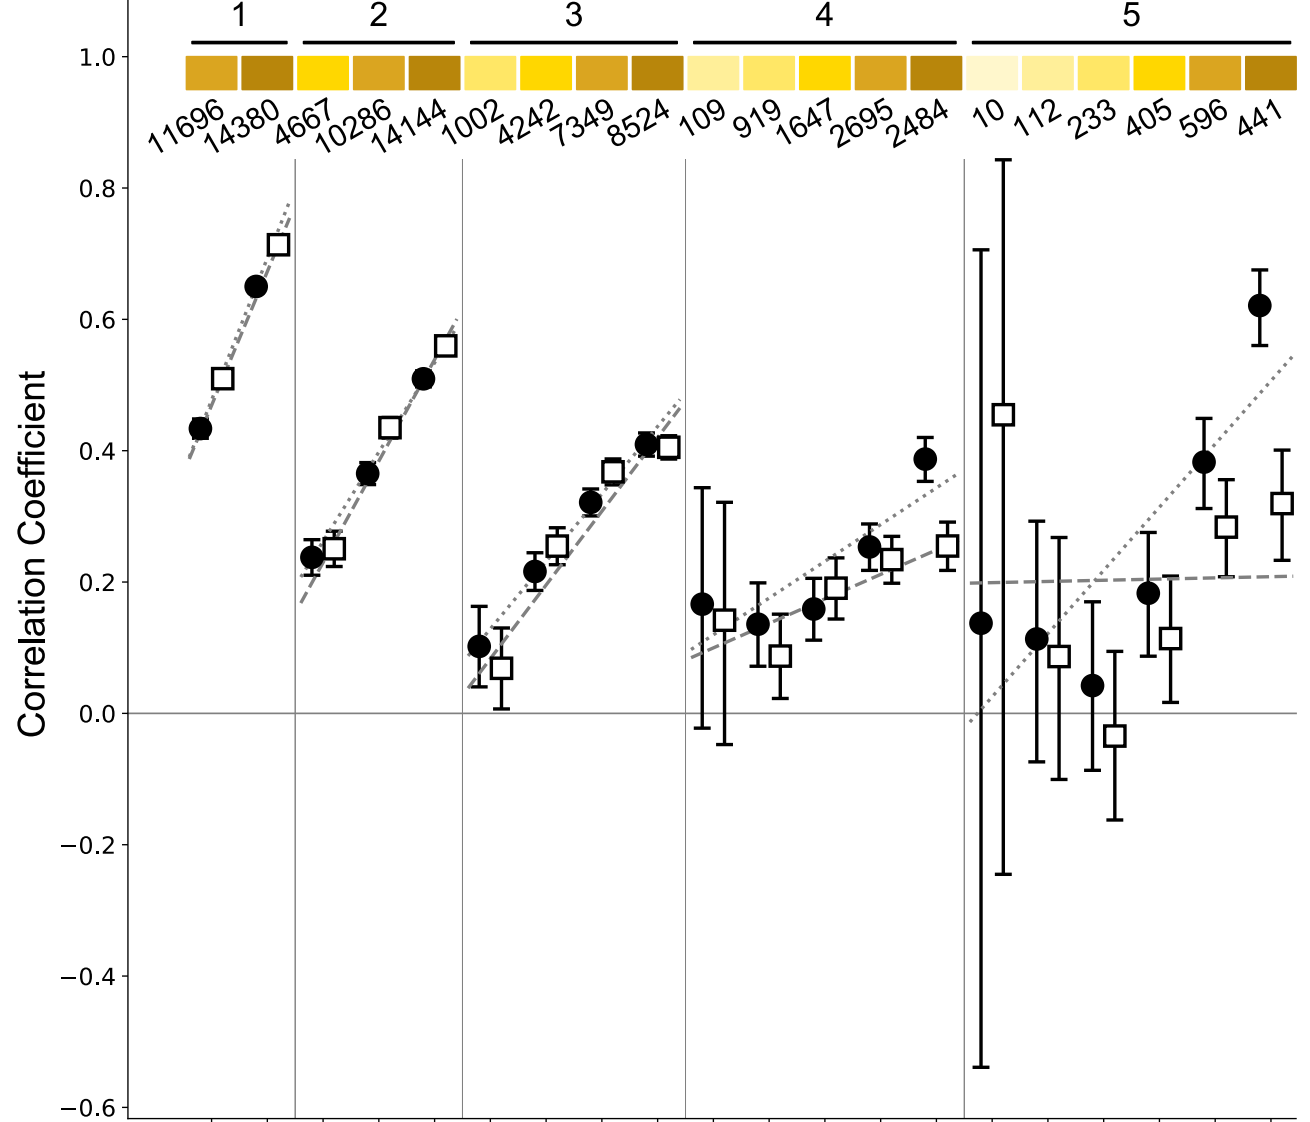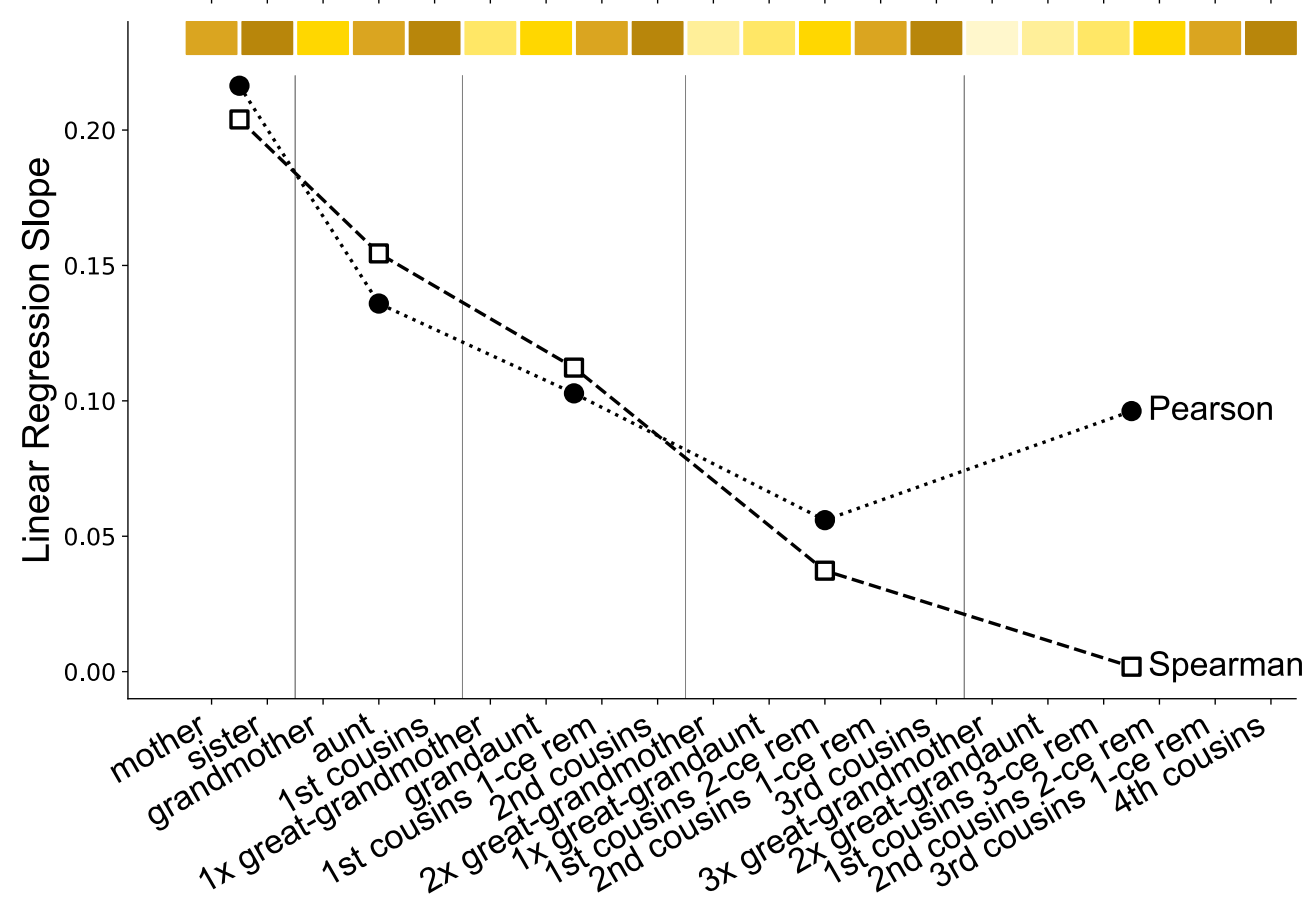

Supplement: Supplementary file 1 [file 31135720 › Figure S6.PDF]
